# Supplementary material for: Block copolymer as a novel functional phase in an aqueous biphasic system for species selective iodine extraction
Source: Royal Society of Chemistry journal article supplement (doi:10.1039/c5ra04445f), 2015-01-01
Supplement: c5ra04445f1.pdf [file c5ra04445f1.pdf]

## Block Copolymer As a Novel Functional Phase in an Aqueous Biphasic System for Species Selective Iodine Extraction

Pallabi Samaddar, Arabinda Chakraborty and Kamalika Sen\*

Department of Chemistry, University of Calcutta, 92 APC Road, Kolkata 700009, India

(*email: kamalchem.roy@gmail.com*)

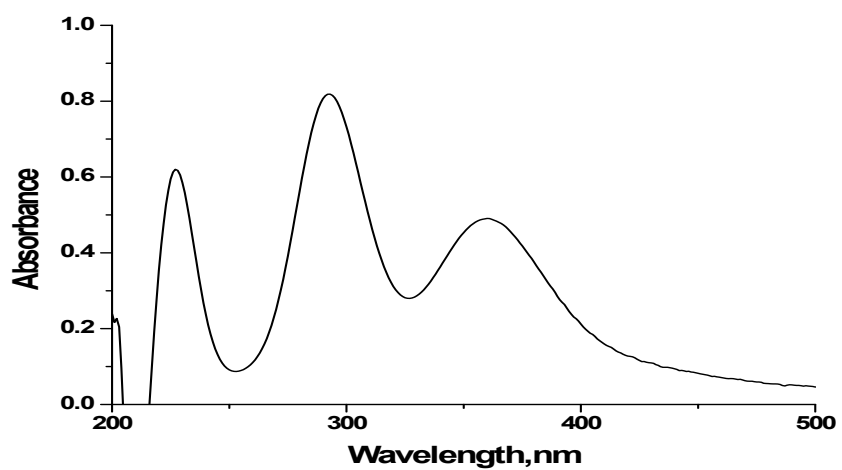

Figure S1: Absorption spectrum of I<sub>2</sub> species dissolved in PPG-PEG-PPG medium

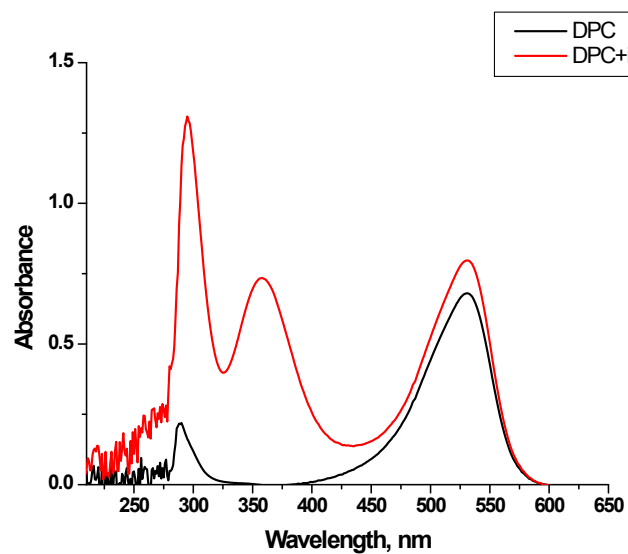

Figure S2: Absorption spectra for DPC and DPC-iodide complex in PPG-PEG-PPG medium

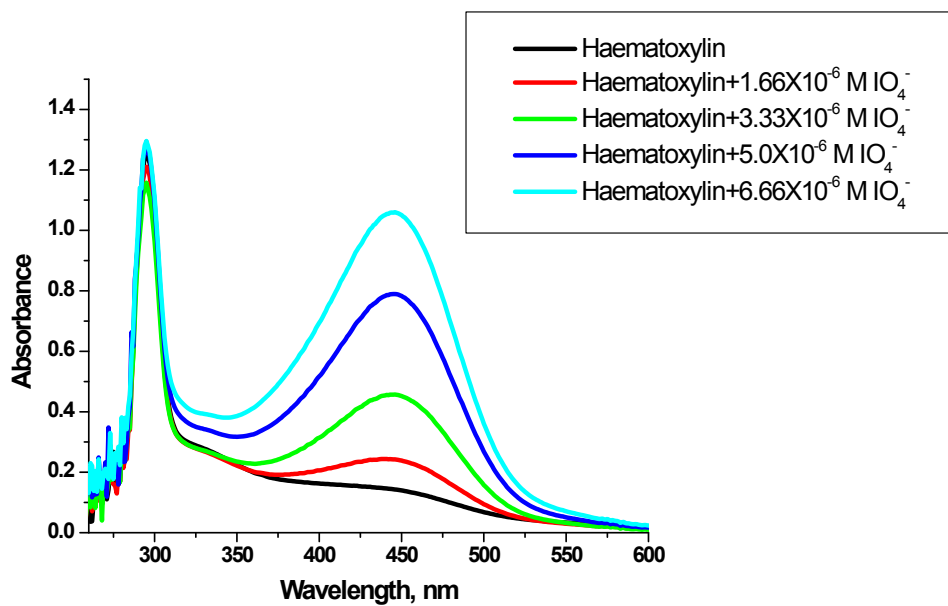

Figure S3: Absorption spectra of haematoxylin and periodate treated haematoxylin

Table S1: Experimental (Liquid + Liquid) Equilibrium Data for the system Sodium tartrate ( $x_1$ ) + PPG-PEG-PPG ( $x_2$ ) in water for mass fractions and Tie-line Length (TLL) at the Temperature  $T= 296\pm 0.5$  K, Pressure  $p = 0.1$  MPa

| Feed Composition |           | Top phase   |              | Bottom Phase |          | TLL          | STL           |
|------------------|-----------|-------------|--------------|--------------|----------|--------------|---------------|
| $X_1$            | $X_2$     | $X_1$       | $X_2$        | $X_1$        | $X_2$    |              |               |
| <b>18.40</b>     | <b>30</b> | <b>0.26</b> | <b>65.22</b> | <b>33.85</b> | <b>0</b> | <b>73.36</b> | <b>- 1.94</b> |
| <b>15.95</b>     | <b>34</b> | <b>0.30</b> | <b>64.15</b> | <b>33.60</b> | <b>0</b> | <b>72.28</b> | <b>- 1.93</b> |

Table S2: Fitting parameters of the binodal curve

| <b>A</b>      | <b>B</b>        | <b><math>C \times 10^{-4}</math></b> | <b><math>R^2</math></b> |
|---------------|-----------------|--------------------------------------|-------------------------|
| <b>81.854</b> | <b>- 0.4472</b> | <b>8.76</b>                          | <b>0.998</b>            |
